# Supplementary material for: Highly emissive deoxyguanosine analogue capable of direct visualization of B–Z transition
Source: Royal Society of Chemistry journal article supplement (doi:10.1039/c3cc48297a), 2013-12-05
Supplement: c3cc48297a.pdf [file c3cc48297a.pdf]

*Supporting Information*

Highly Emissive Deoxyguanosine Analogue  
Capable of Direct Visualization of B-Z Transition†

*Soyoung Park,\*† Haruka Otomo,† Linjie Zheng,† and Hiroshi*

*Sugiyama\*†,‡,§*

†Department of Chemistry, Graduate School of Science, Kyoto University,  
Kitashirakawa-oiwakecho, Sakyo-ku, Kyoto 606-8502, Japan

‡Institute for Integrated Cell-Material Sciences (iCeMS), Kyoto University,  
Yoshida-ushinomiyacho, Sakyo-ku, Kyoto 606-8501, Japan

§CREST, Japan Science and Technology Corporation (JST), Sanbancho, Chiyoda-ku,  
Tokyo 102-0075, Japan

\*Corresponding author: Dr. Soyoung Park, Prof. Dr. Hiroshi Sugiyama

Tel.: (+)81-75-753-4002; Fax: (+)81-75-753-3670

E-mail: oleesy@kuchem.kyoto-u.ac.jp, hs@kuchem.kyoto-u.ac.jp (H.S.)

### **Materials used for synthesis of <sup>th</sup>dG**

DMSO<sub>2</sub>, MeNO<sub>2</sub>, *N,N*-dimethylformamide dimethyl acetal, 2-cyanoethyl *N,N*-diisopropylchloro phosphoramidite and dimethoxytrityl chloride were received from Wako Chemicals and used without further purification. SnCl<sub>4</sub> was purchased from Sigma-Aldrich Chemicals Co. (Milwaukee, WI). 2.0 M ammonia in methanol was received from TCI. Methyl 4-aminothiophene-3-carboxylate hydrochloride was purchased from Apollo Scientific Ltd. All other chemicals and solvents were purchased from Sigma-Aldrich Chemicals Co., Wako Pure Chemical Ind. Ltd., TCI, or Kanto Chemical Co. Inc. β-D-deoxyribofuranose 1-acetate 4,5-dibenzoate and Chloroformamidine hydrochloride were prepared by following the literature procedures [1, 2]. Water was deionized (specific resistance of ≥ 18.0 MΩ cm at 25 °C) by a Milli-Q system (Millipore Corp.).

### **Methods used for synthesis of <sup>th</sup>dG**

NMR spectra were obtained on a JEOL JNM ECA-600 spectrometer operating at 600 MHz for <sup>1</sup>H NMR and in CDCl<sub>3</sub> unless otherwise noted. Flash column chromatography was performed employing Silica Gel 60 (70–230 mesh, Merck Chemicals). Silica-gel preparative thin-layer chromatography (PTLC) was performed using plates from Silica gel 70 PF<sub>254</sub> (Wako Pure Chemical Ind. Ltd.).

## Synthesis of <sup>th</sup>dG and its phosphoramidite

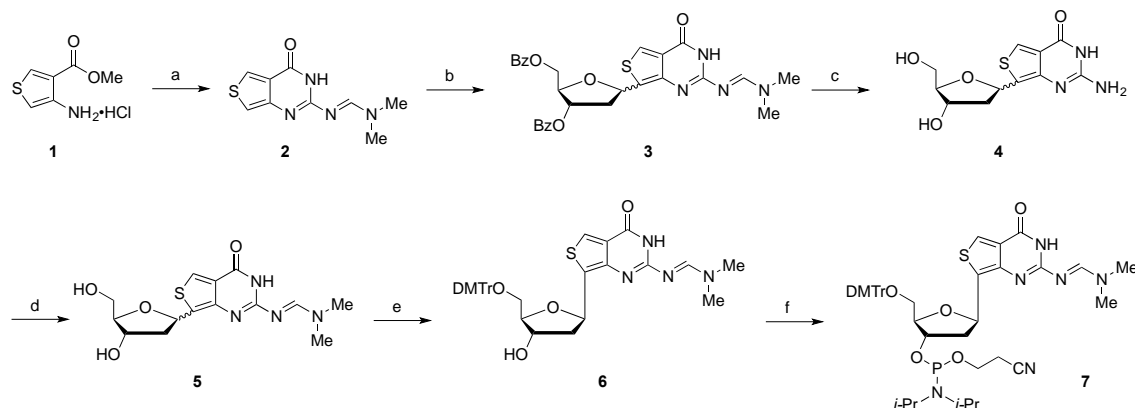

Reagents and conditions: (a) (i) Chloroformamide hydrochloride, DMSO<sub>2</sub>, 125 °C; (ii) dimethylformamide dimethyl acetal, DMF, 98%; (b) β-D-deoxyribofuranose 1-acetate 4,5-dibenzoate, SnCl<sub>4</sub>, MeNO<sub>2</sub>, 0 °C to RT, 54%; (c) NH<sub>3</sub>/MeOH, 65 °C, 71%; (d) dimethylformamide dimethyl acetal, DMF/MeOH, 76%; (e) DMTrCl, Py, 51%; (f) 2-cyanoethyl *N,N*-diisopropylchloro phosphoramidite, *i*Pr<sub>2</sub>NEt, DCM/MeCN, 0 °C to RT

### *N*<sup>2</sup>-DMF 2-aminothieno[3,4-*d*]pyrimidine G mimic 3,5-di-*O*-benzoyldeoxynucleoside (3)

*N*<sup>2</sup>-DMF 2-aminothieno[3,4-*d*]pyrimidin-4(3*H*)-one(2) was prepared from methyl 4-aminothiophene-3-carboxylate hydrochloride(1) as reported previously.<sup>[1]</sup> To a suspension of *N*<sup>2</sup>-DMF 2-aminothieno[3,4-*d*]pyrimidin-4(3*H*)-one (1.1 g, 4.7 mmol) and β-D-deoxyribofuranose 1-acetate 4,5-dibenzoate<sup>[2]</sup> (1.9 g, 5.0 mmol) in dry MeNO<sub>2</sub> (20 mL) was dropwise added SnCl<sub>4</sub>(1.2 mL, 10 mmol) over 10 min at 0 °C and stirred for 10 min at the same temperature. Removed from ice bath and after 3 h stirring at room temperature, β-D-deoxyribofuranose 1-acetate 4,5-dibenzoate(0.97 g, 2.5 mmol) was added to the reaction mixture and then was stirred overnight. Sat. aq. NaHCO<sub>3</sub> was added to the mixture and diluted with CH<sub>2</sub>Cl<sub>2</sub>. The resulting mixture was vigorously stirred for 1.5 h and the precipitate was filtered over a Celite cake. The separated aq. layer was extracted with CH<sub>2</sub>Cl<sub>2</sub>. The combined layer were dried over MgSO<sub>4</sub> and evaporated. The residue was purified by column chromatography with CH<sub>2</sub>Cl<sub>2</sub>:MeOH = 35:1 to afford a brown product (1.4 g, 54%, mixture of β/α = 3/1). <sup>1</sup>H NMR of β-anomer (600 MHz, CDCl<sub>3</sub>): δ 8.66 (s, 1H), 8.40 (s, 1H), 8.12-8.06 (m, 5H), 7.62-7.55 (m, 2H), 7.49-7.36 (m, 4H), 5.97-5.94 (m, 1H), 5.71 (m, 1H), 4.65-4.54 (m, 4H), 3.16 (s, 3H),

3.07 (s, 3H); ESI-HRMS calculated for  $C_{28}H_{27}N_4O_6S$   $[M^+H]^+$  547.1651, found 547.1691.

#### **2-Aminothieno[3,4-*d*]pyrimidine G mimic deoxynucleoside (4)**

A solution of **3** (1.6 g, 2.9 mmol) in 2.0 M ammonia (150 mL) in methanol was heated at 65 °C overnight. In brown reaction mixture, white solid appeared and then dissolved. The mixture was evaporated and purified by column chromatography with  $CH_2Cl_2:MeOH = 35:1$  to afford a brown oil. (540 mg, 65%, mixture of  $\beta/\alpha = 3/1$ )  $^1H$  NMR of  $\beta$ -anomer (600 MHz,  $DMSO-d_6$ ):  $\delta$  10.49 (s, 1H), 8.12 (s, 1H), 6.12 (s, 2H), 5.56 (dd,  $J = 10.54, 5.14$  Hz, 1H), 5.05 (d,  $J = 3.45$  Hz), 4.80 (s, 1H), 4.20 (s, 1H), 3.74-3.72 (m, 1H), 3.44-3.33 (m, 2H), 1.92-1.87 (m, 1H); ESI-HRMS calculated for  $C_{11}H_{14}N_3O_4S$   $[M^+H]^+$  284.0705, found 284.0598.

#### ***N*<sup>2</sup>-DMF-2-aminothieno[3,4-*d*]pyrimidine G mimic deoxynucleoside (5)**

A solution of **4** (540 mg, 1.9 mmol) and *N, N*-dimethylformamide dimethyl acetal (0.38 mL) in DMF/MeOH (1/1, 24 mL) was stirred overnight at RT. All volatiles were evaporated, and the oily residue was coevaporated with DMF (2 × 2 mL). The residue was purified by column chromatography with  $CH_2Cl_2:MeOH = 35:1$  to afford a yellow solid (26 mg, 87 %, mixture of  $\beta/\alpha = 3/1$ ).  $^1H$  NMR of  $\beta$ -anomer (600 MHz,  $DMSO-d_6$ ):  $\delta$  10.99 (s, 1H), 8.54 (s, 1H), 8.16 (s, 1H), 5.66 (dd,  $J = 10.19, 5.46$  Hz, 1H), 5.11 (d,  $J = 4.10$  Hz, 1H), 4.80 (t,  $J = 5.46$  Hz, 1H), 4.23 (m, 1H), 3.77-3.75 (m, 1H), 3.48-3.38 (m, 2H), 3.15 (s, 3H), 3.02 (s, 3H), 2.18-2.15 (m, 1H), 2.02-1.97 (m, 1H); ESI-HRMS calculated for  $C_{14}H_{19}N_4O_4S$   $[M^+H]^+$  339.1127, found 339.1153.

#### ***O*<sup>5'</sup>-Dimethoxytrityl-*N*<sup>2</sup>-DMF-2-aminothieno[3,4-*d*]pyrimidine G mimic deoxynucleoside (6)**

**5** (50 mg, 0.15 mmol) was coevaporated with dry pyridine (2 × 1 mL). DMTrCl (60 mg, 0.18 mmol) in dry pyridine (0.3 mL) was added and the solution was stirred at RT for 3 hours. The reaction mixture was directly loaded on silica pad for column chromatography with  $CH_2Cl_2:MeOH = 1:0$  to 10:1 containing 1.5 % triethylamine to afford an off-white solid (48 mg, 51 %).  $^1H$  NMR of  $\beta$ -anomer (600 MHz,  $CDCl_3$ ):  $\delta$  8.67 (s, 1H), 8.19 (s, 1H), 8.09 (s, 1H), 7.47 (d,  $J = 8.31$  Hz, 2H), 7.35 (dd,  $J = 8.85, 3.39$  Hz, 4H), 7.28-7.26 (m, 2H), 7.21-1.18 (m, 1H), 6.81 (d,  $J = 8.20, 4H$ ), 5.95 (dd,  $J$

= 10.20, 5.44 Hz, 1H), 4.50 (m, 1H), 4.05 (m, 1H), 3.78 (s, 6H), 3.29 (m, 2H), 3.15 (d,  $J = 2.73$  Hz, 3H), 3.05 (d,  $J = 2.67$  Hz, 3H), 2.40 (ddd,  $J = 13.43, 5.61, 2.04$  Hz, 1H), 2.28 (ddd,  $J = 13.26, 10.20, 6.12$  Hz, 1H), 1.93 (s, 1H); ESI-HRMS calculated for  $C_{35}H_{37}N_4O_6S$   $[M^+H]^+$  641.2434, found 641.2494.

**(3'-(2-Cyanoethyldiisopropylphosphoramidite)-O<sup>5'</sup>-dimethoxytrityl-N<sup>2</sup>-DMF-2-aminothieno [3,4-*d*]pyrimidine G mimic nucleoside (7)**

**6** (50 mg, 0.080 mmol) was coevaporated with dry pyridine ( $2 \times 1$  mL), dried under vacuum for 3 h, and dissolved in 0.7 mL of dry  $CH_2Cl_2$ . *N, N*-diisopropylethylamine (0.041 mL, 0.24 mmol) and 2-cyanoethyl *N, N*-diisopropylchlorophosphoramidite (0.035 mL, 0.16 mmol) were successively added to the solution at 0 °C, and the reaction mixture was allowed to warm up and stirred 3 h at RT. All volatiles were then evaporated and without further purification the residue dissolved in  $CH_2Cl_2/MeCN$  (1/3, 0.5 mL) for DNA solid synthesis.

**Figure S1.** NMR spectra of **6** ( $\beta$ - and  $\alpha$ -anomer). (a)  $^1\text{H}$  NMR spectrum of **6** ( $\beta$ -anomer) (b) COSY spectrum of **6** ( $\beta$ -anomer) (c) NOESY spectrum of **6** ( $\beta$ -anomer) (d)  $^1\text{H}$  NMR spectrum of **6** ( $\alpha$ -anomer) (e) COSY spectrum of **6** ( $\alpha$ -anomer) (f) NOESY spectrum of **6** ( $\alpha$ -anomer)

(a)  $^1\text{H}$  NMR spectrum of **6** ( $\beta$ -anomer)

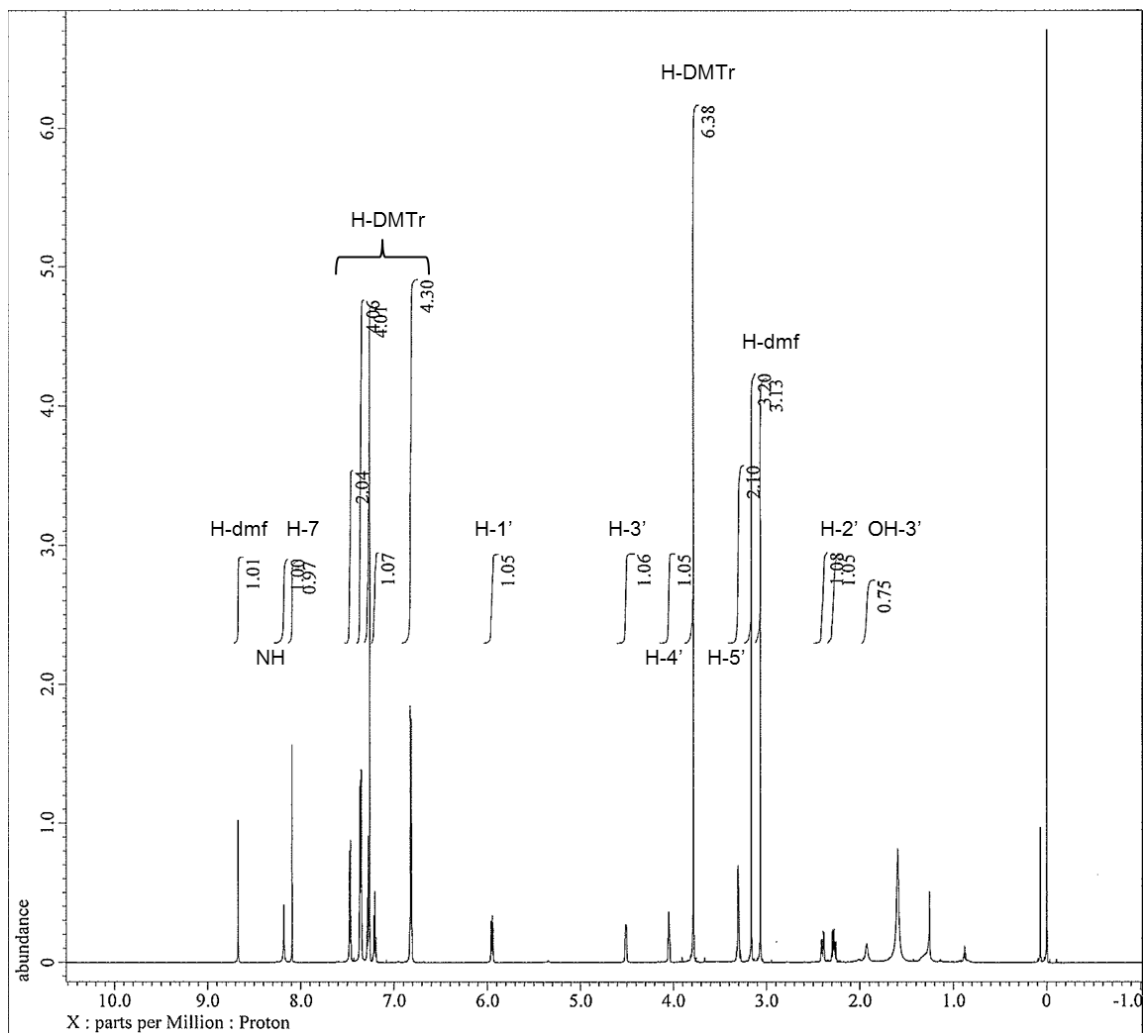

(b) COSY spectrum of **6** ( $\beta$ -anomer)

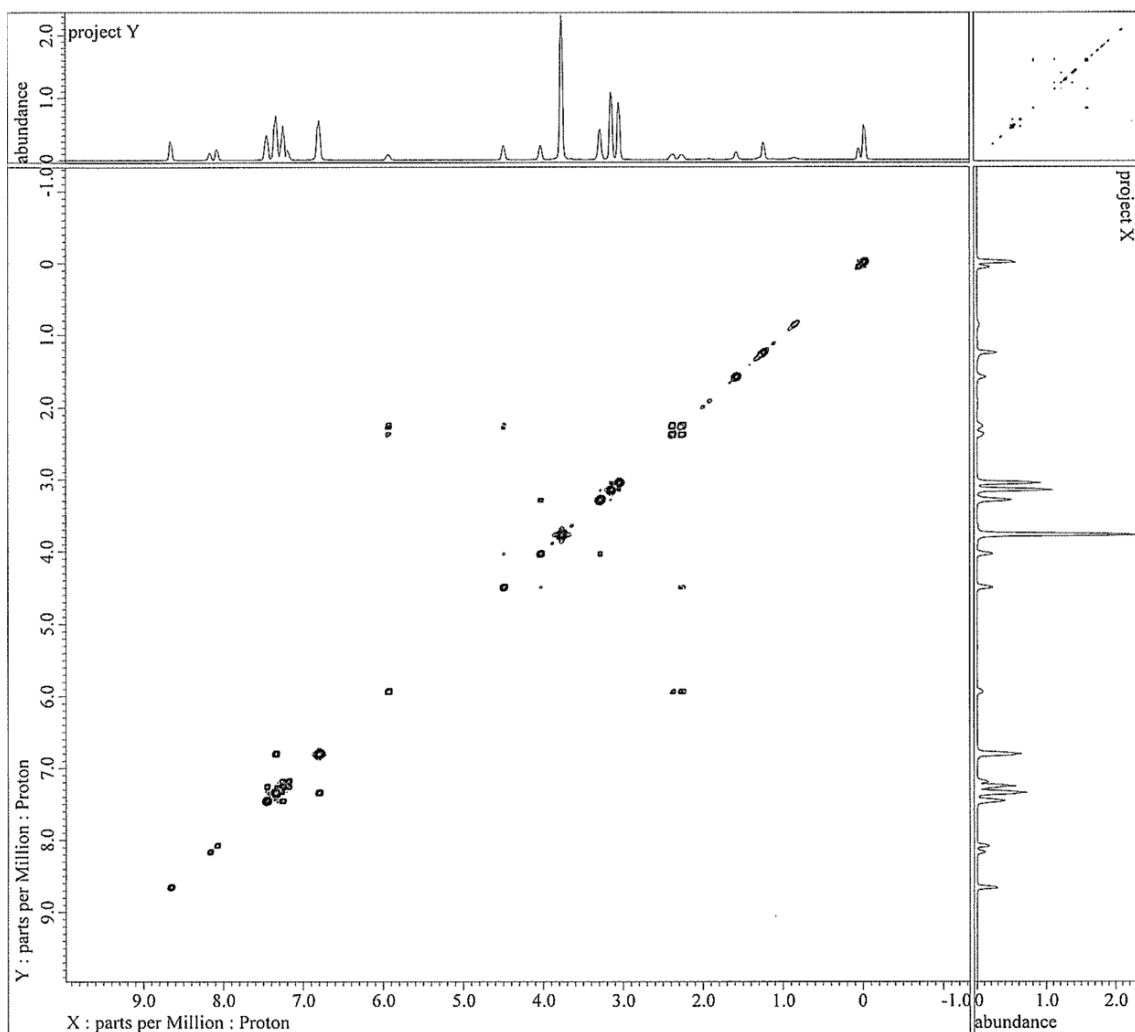

(c) NOESY spectrum of **6** ( $\beta$ -anomer)

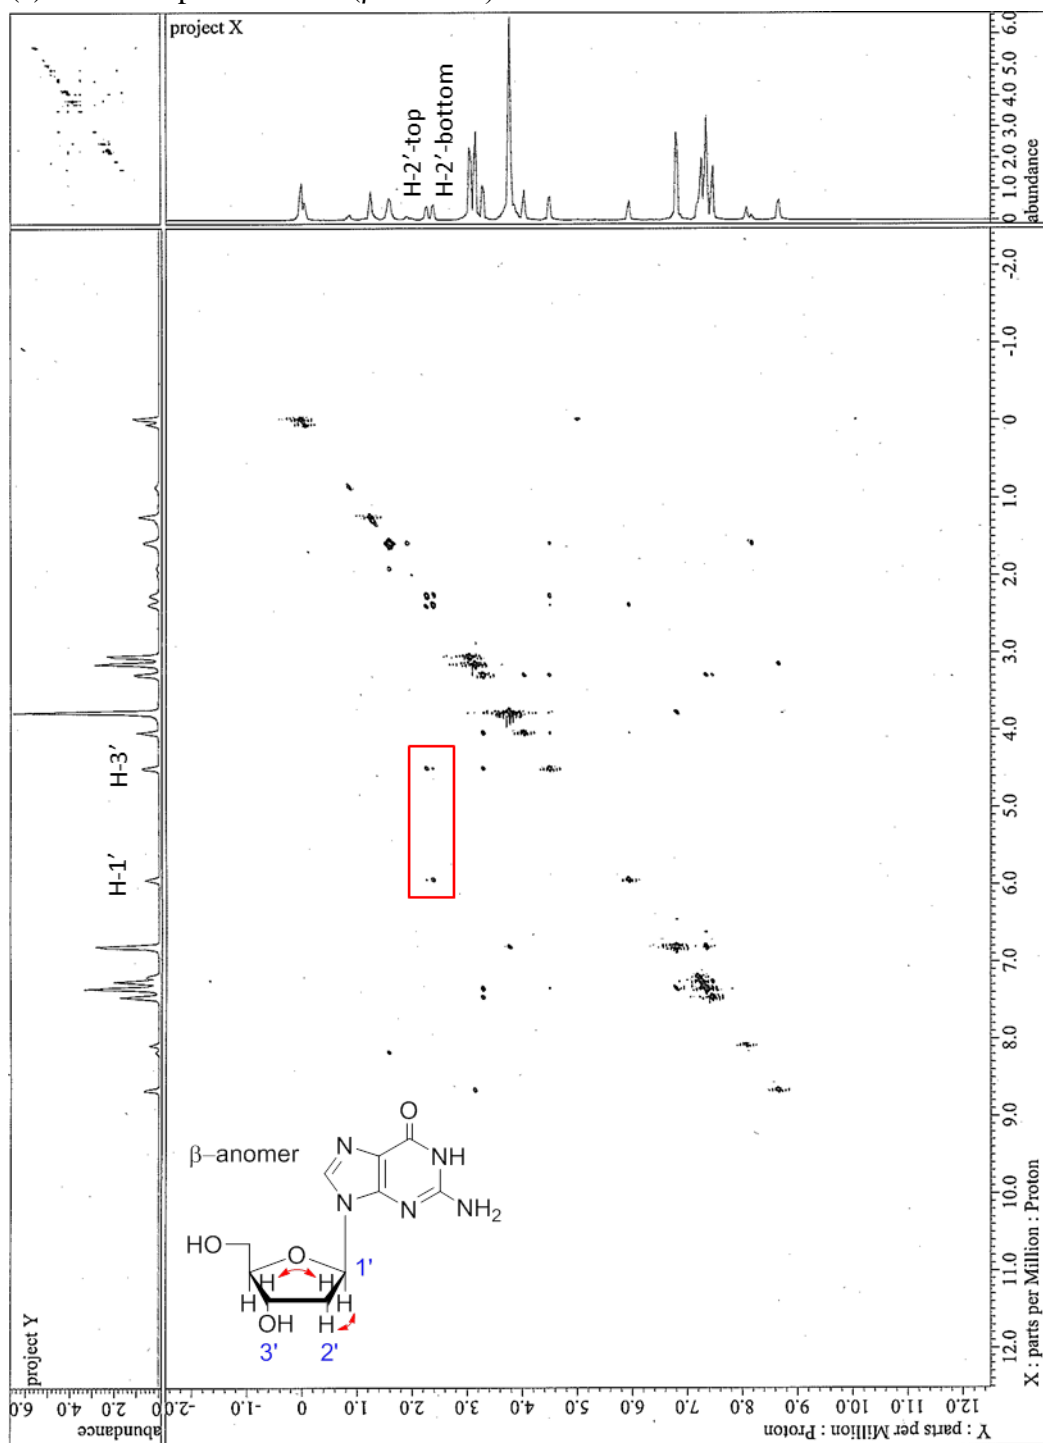



(d)  $^1\text{H}$  NMR spectrum of **6** ( $\alpha$ -anomer)

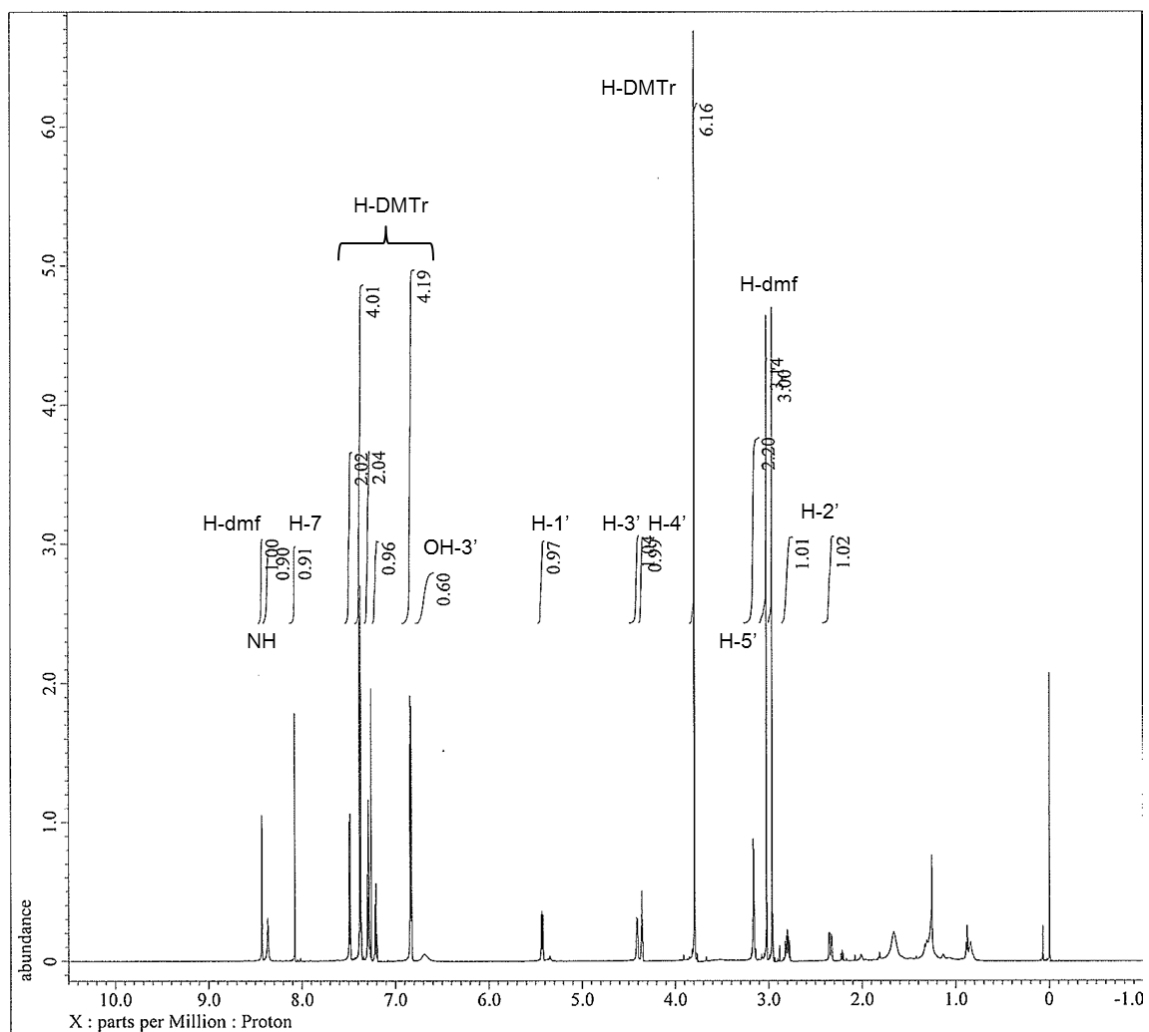

(e) COSY spectrum of **6** ( $\alpha$ -anomer)

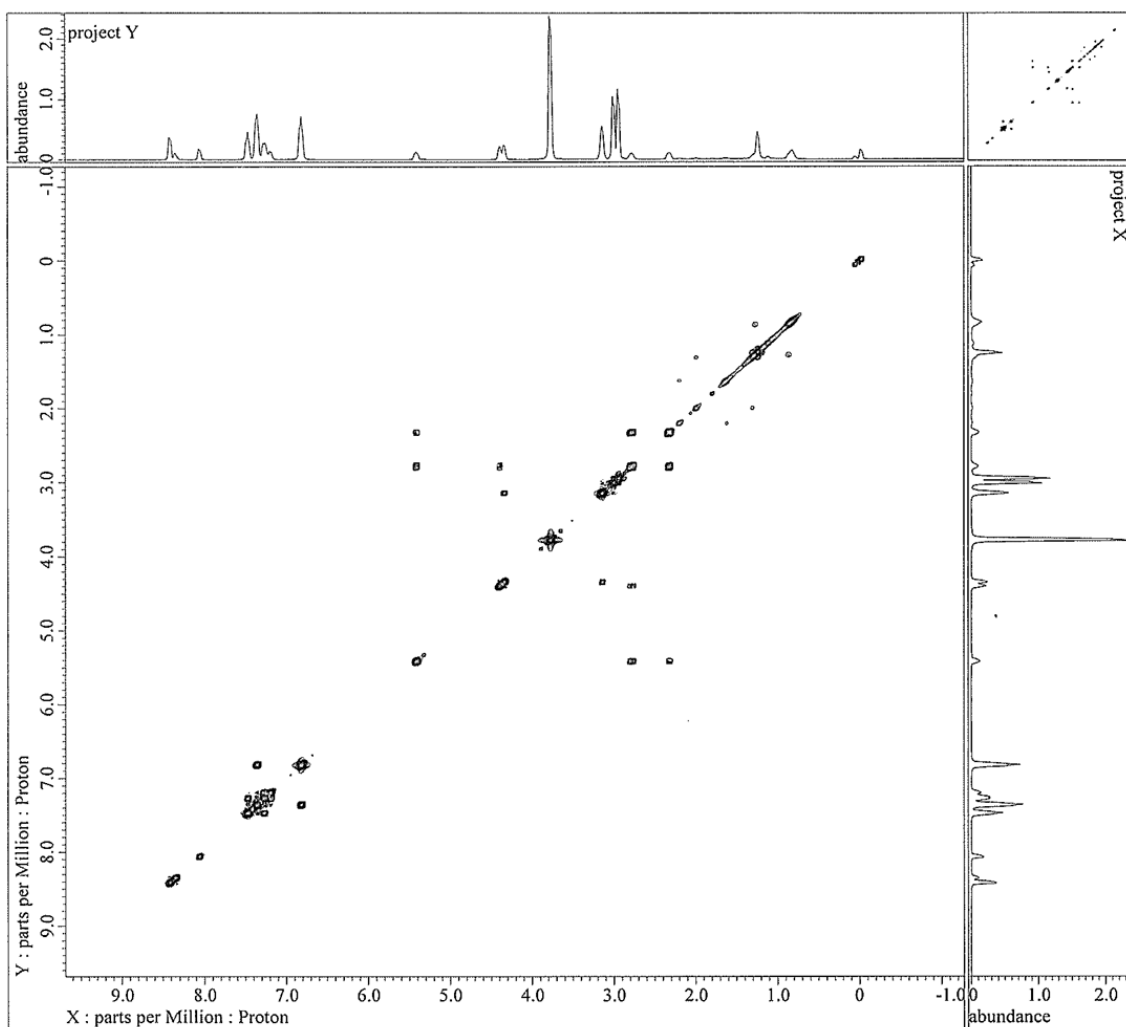

(f) NOESY spectrum of **6** ( $\alpha$ -anomer)

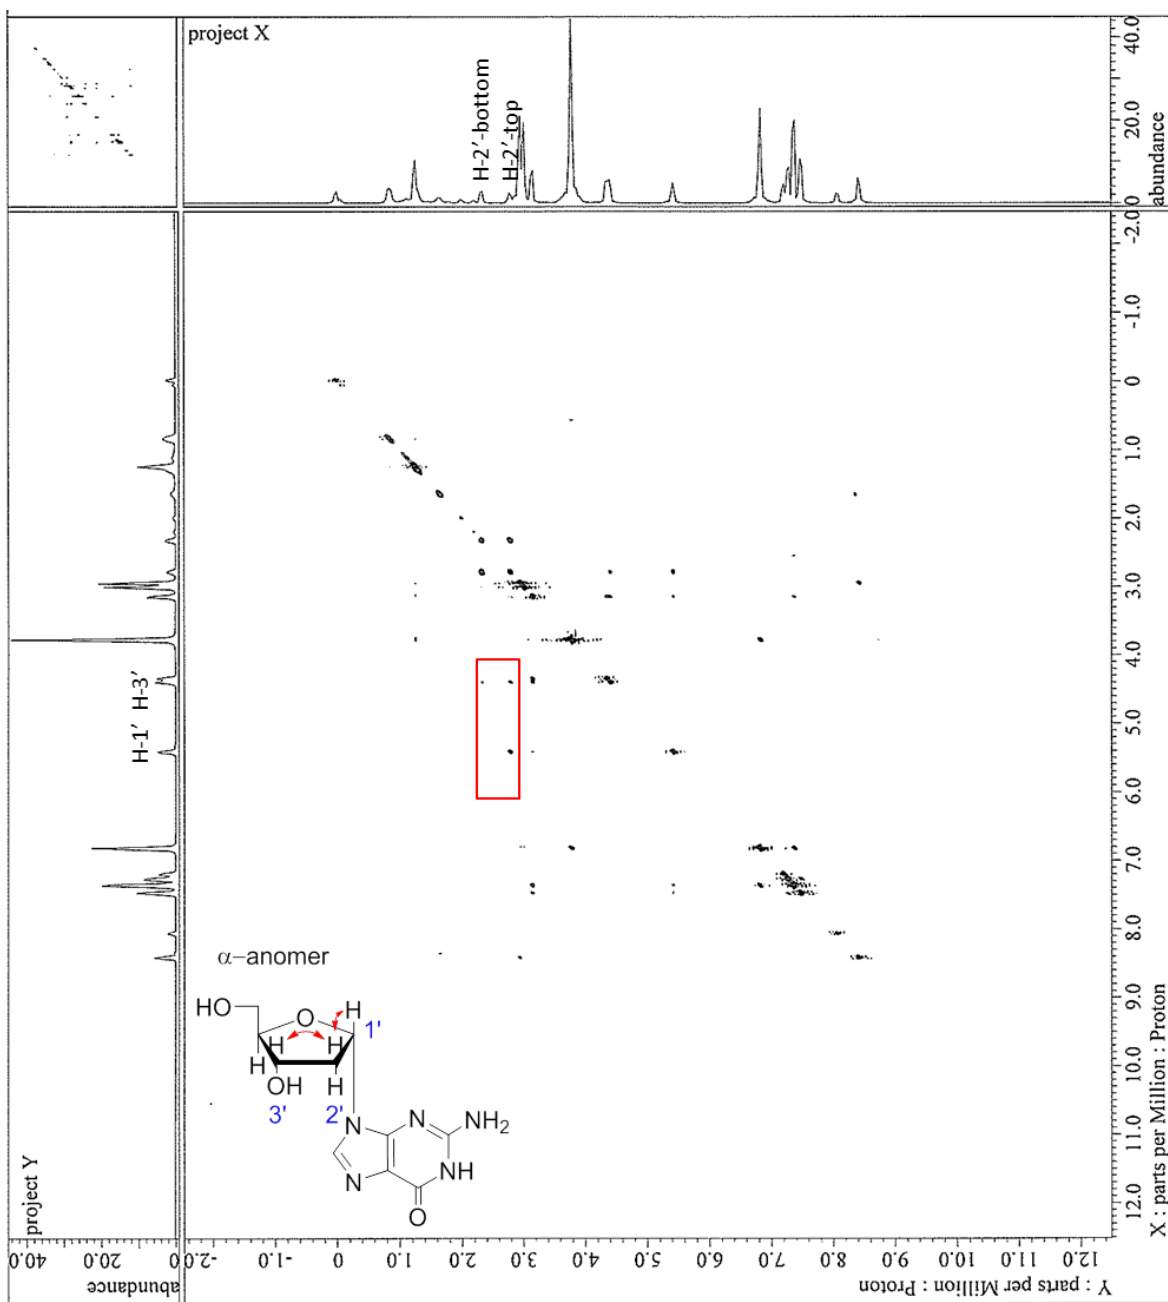

### Photophysical data for <sup>th</sup>dG monomer

Samples were studied in water, dioxane, and MeOH at 20 °C. All samples were prepared from a DMSO stock solution. Measurement was conducted with 10 μM <sup>th</sup>dG monomer in the each solvent containing trace DMSO. All experiments were performed in duplicate with negligible differences; hence only one series is shown.

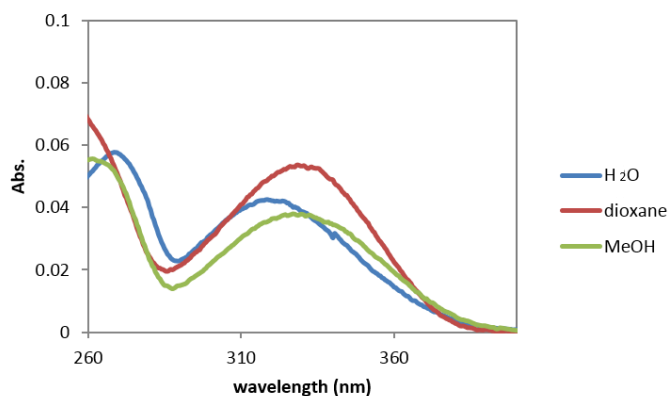

**Figure S2.** JASCO V-650 UV/VIS spectrophotometer was used to record absorption spectra with a 0.5 nm resolution. The cuvette temperature was kept at 25 °C by JASCO PAC-743R. Samples were prepared with 10 μM in H<sub>2</sub>O, dioxane, or MeOH (blue, red, or green line).

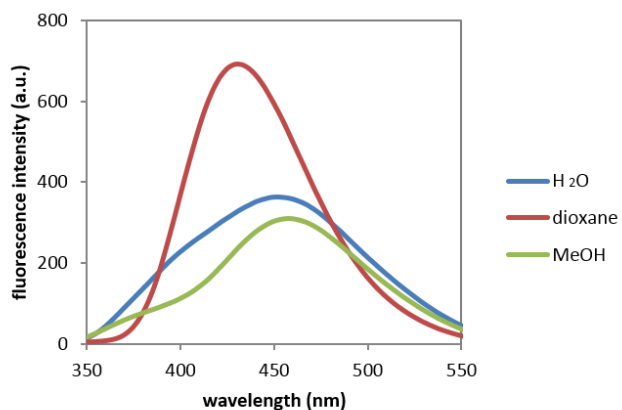

**Figure S3.** Fluorescence measurements were conducted using a JASCO FP-6300 spectrofluorometer. The sample temperature was controlled with a JASCO EHC-573 at 25 °C. Measurements were performed using fluorescence cells with a 0.5-cm path length. The result of the sample dissolved in H<sub>2</sub>O is shown as a blue line, dioxane is red line, and MeOH is green line.

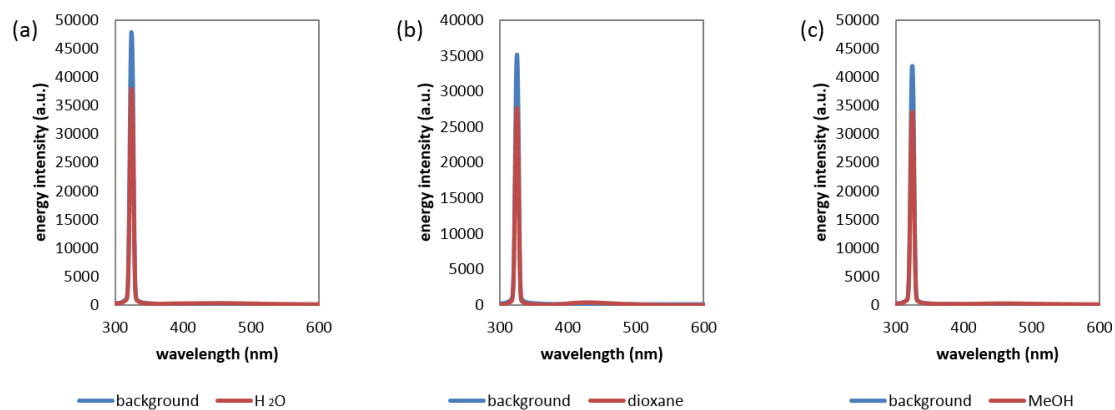

**Figure S4.** Quantum yields were measured with HAMAMATSU Absolute PL Quantum Yield spectrometer C11347. Samples were dissolved in (a) H<sub>2</sub>O (b) dioxane (c) MeOH. All samples were excited at 325 nm. In addition, ODN9 in 20 mM sodium cacodylate buffer (pH 7.0) and 0 M or 5 M of NaClO<sub>4</sub> at 25 °C exhibit very low quantum yields of 0.023 and 0.062. This suggests that ODN9 convert some of the absorption at 260 nm into the emission.

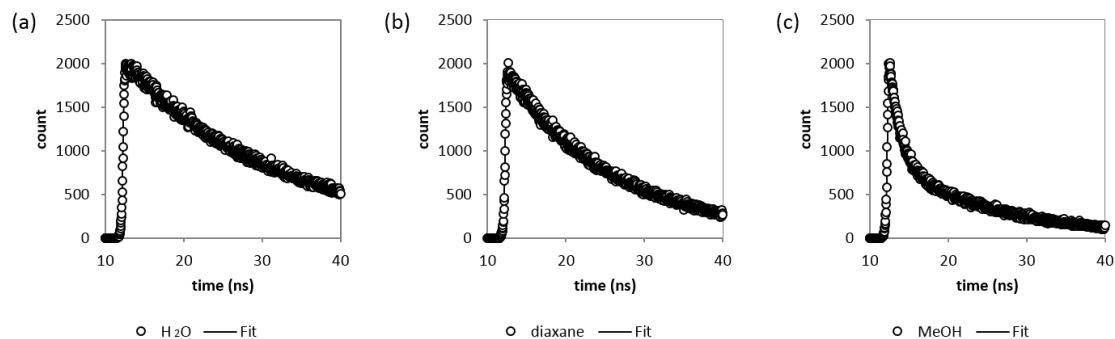

**Figure S5.** Fluorescence decay curves were collected on a HORIBA Fluorocube 3000U-SHK using an LED laser source for excitation. All samples were excited at 325 nm and the fluorescence decay was observed at 450 nm. Decay curves were fitted using three exponential functions. Samples were dissolved in (a) H<sub>2</sub>O (b) dioxane (c) MeOH.

### Solid-Phase Synthesis

ODNs having <sup>th</sup>dG (ODN1, 8, 9) were synthesized on solid supports using (3'-(2-Cyanoethyl)diisopropylphosphoramidite)-*O*<sup>5'</sup>-dimethoxytrityl-*N*<sup>2</sup>-DMF-2-aminothieno [3,4-d]pyrimidine G mimic nucleoside (7) and commercially available *O*<sup>5'</sup>- dimethoxytrityl -2'-deoxyribonucleoside *O*<sup>3'</sup>-phosphoramidites. Solid-phase oligonucleotide synthesis was performed on an ABI DNA synthesizer (Applied Biosystem, Foster City, CA). The modified phosphoramidite was chemically synthesized as described above and without purification incorporated into oligonucleotide through coupling reaction for 10 minutes. Cleavage from the solid support and deprotection were accomplished with 50:50 of MeNH<sub>2</sub> in 40 wt. % in water and NH<sub>3</sub> in 28 wt. % in water at rt for 15 min and then at 65 °C for 15 min. After purification by HPLC, products were confirmed by ESI-TOFMS (Table S1). DNA concentrations were determined by using the Nano drop ND-1000 (Nano-drop Technologies, Wilmington, DE).

**Table S1.** ESI-TOF-Mass data of ODNs.

|                           | calcd. | found  |
|---------------------------|--------|--------|
| ODN1 [M-4H] <sup>-4</sup> | 1361.7 | 1362.3 |
| ODN8 [M-3H] <sup>-3</sup> | 1013.8 | 1014.0 |
| ODN9 [M-3H] <sup>-3</sup> | 1018.5 | 1018.7 |

Other ODNs are received from SIGMA-Genosys or JBios.

### **UV-melting**

Melting temperatures were determined by measuring changes in absorbance at 260 nm as a function of temperature using a JASCO V-650 UV/VIS spectrophotometer. JASCO PAC-743R equipped with a high performance temperature controller and micro auto eight-cell holder. Absorbance was recorded in the forward and reverse direction at temperatures from 5 to 95 °C at a rate of 0.5 °C/min. The melting samples were denatured at 95 °C for 5 min and annealed slowly to RT then stored at 5 °C until experiments were initiated. All melting samples were prepared in a total volume of 100 µL containing 5 µM of each strand oligonucleotide, 20 mM Na cacodylate (pH 7.0) and 100 mM NaCl. Synthetic oligonucleotides were obtained from Sigma-Aldrich Chemicals Co.

### **Fluorescence Measurement**

Fluorescence measurements of <sup>th</sup>dG-containing DNA were conducted using a JASCO FP-6300 spectrofluorometer. The sample temperature was controlled with a JASCO EHC-573. Measurements were performed using fluorescence cells with a 0.5-cm path length. All samples are containing 5 µM of each strand oligonucleotide in 20 mM sodium cacodylate buffer (pH 7.0) and various concentrations of NaClO<sub>4</sub> at 5 °C.

### **CD Spectroscopy**

CD spectra of oligonucleotide solutions collected in 0.5-nm steps from 320 to 220 nm were measured using JASCO J-805LST Spectrometer in a 1-cm quartz cuvette. The buffer and concentrations of NaClO<sub>4</sub> were the same as for Fluorescence measurement. Each spectrum shown is the average of two individual scans.

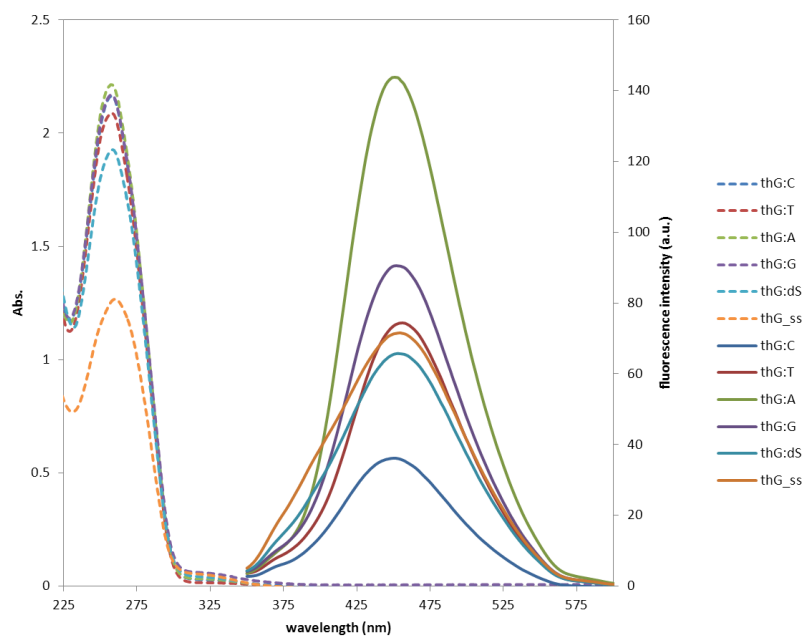

**Figure S6.** Fluorescent properties of ODN1 hybridized with complementary strands containing matched or mismatched bases.

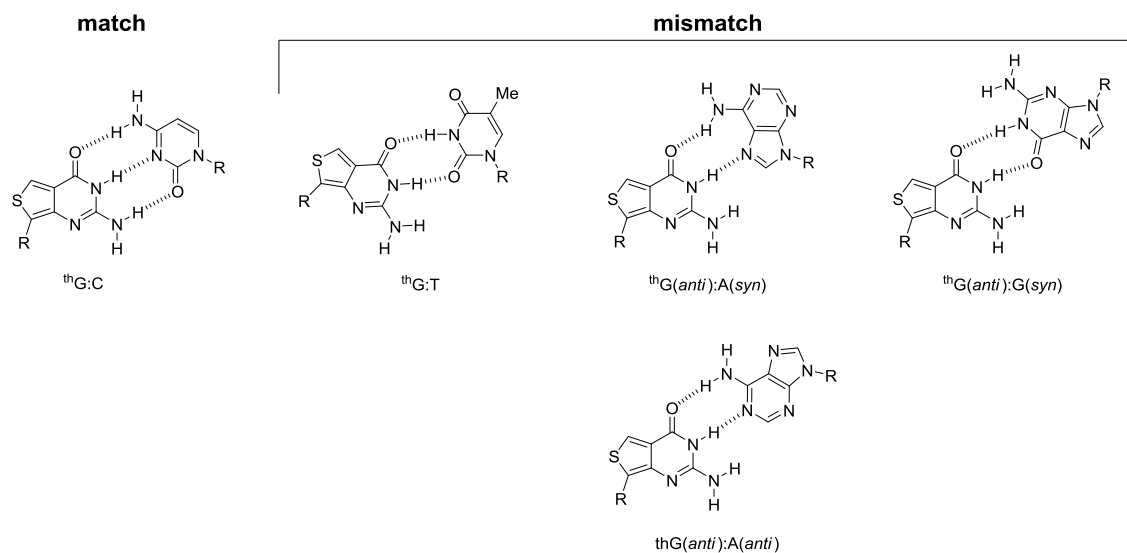

**Figure S7.** Plausible hydrogen-bonding of <sup>th</sup>dG and match or mismatch bases [3, 4].



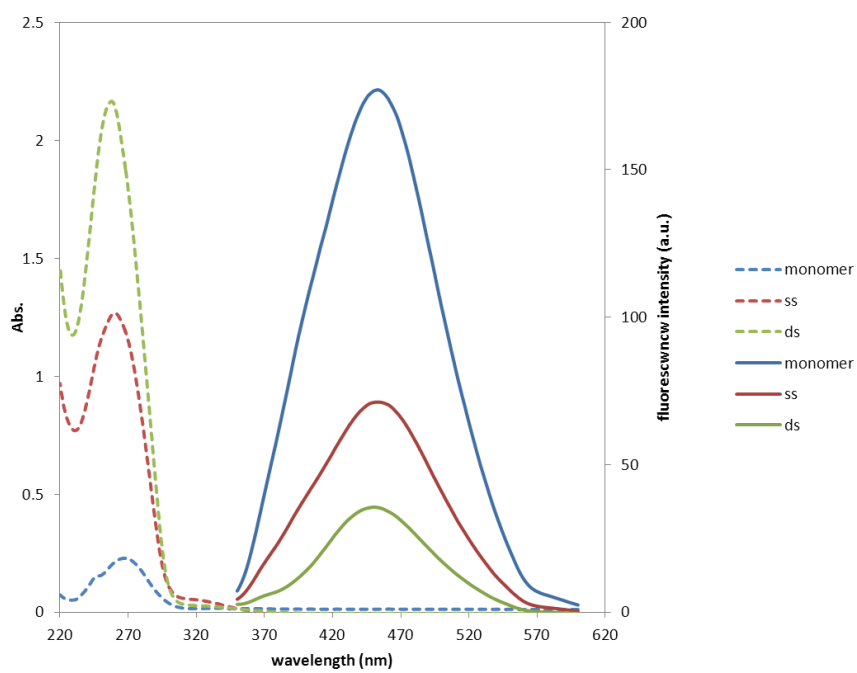

**Figure S8.** Fluorescent properties of <sup>th</sup>dG monomer and ODN1.

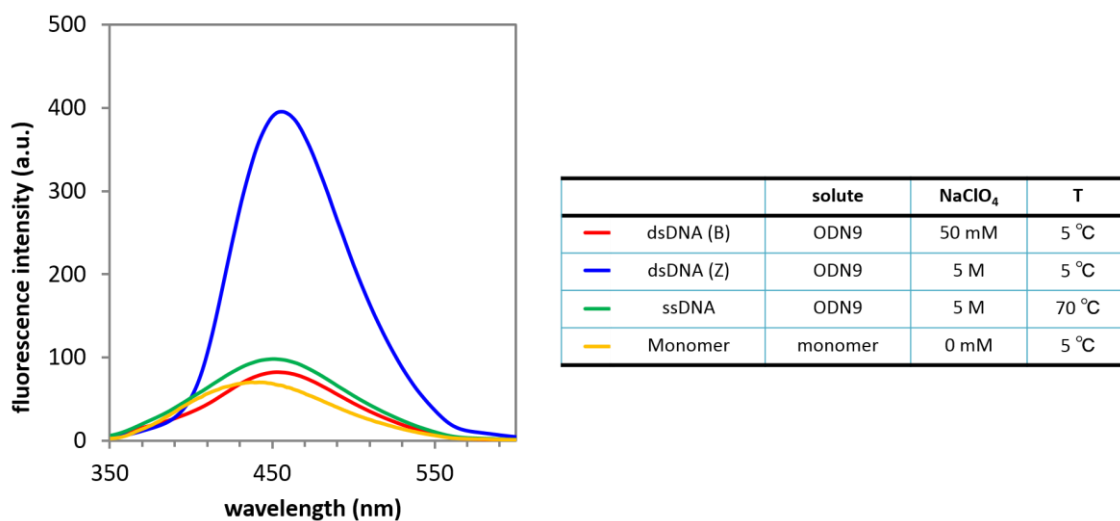

**Figure S9.** Fluorescent properties of <sup>th</sup>dG monomer and ODN9 (single strand, B- or Z-form) Samples are containing 10  $\mu$ M of DNA or monomer in sodium cacodylate buffer (20 mM, pH = 7.0)

### Density Functional theory (DFT) and *Ab initio* Calculations

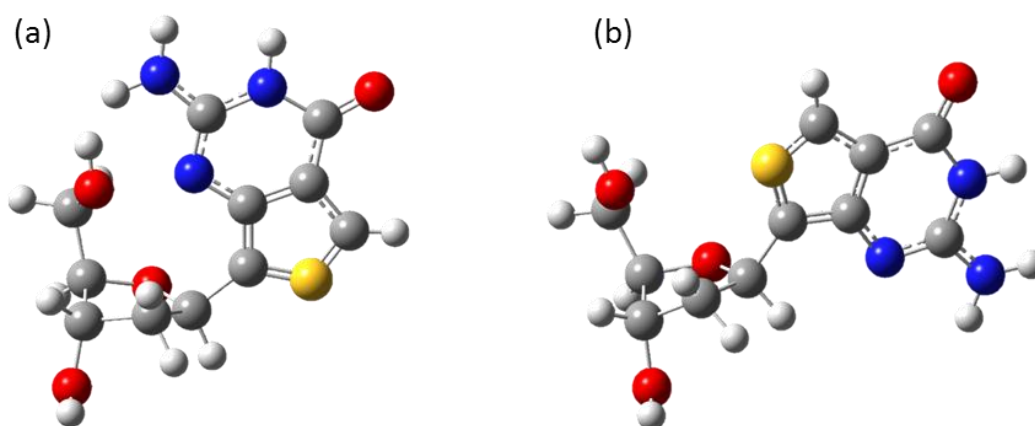

**Figure S10.** Optimized formation of (a) syn-<sup>th</sup>dG and (b) anti-<sup>th</sup>dG. The structures reported here were optimized using B3LYP method and 6-31G\* basis set. Since B3LYP method and 6-31G\* basis set have been shown to be effective for the investigation of biomolecules. All the calculations reported here were carried out at gas phase using the Gaussian 09W software. Energies of syn-<sup>th</sup>dG is -805773.46 kcal/mol. anti-<sup>th</sup>dG is -805723.12 kcal/mol. Anti-<sup>th</sup>dG is more stable than syn-<sup>th</sup>dG by 45.34 kcal/mol.

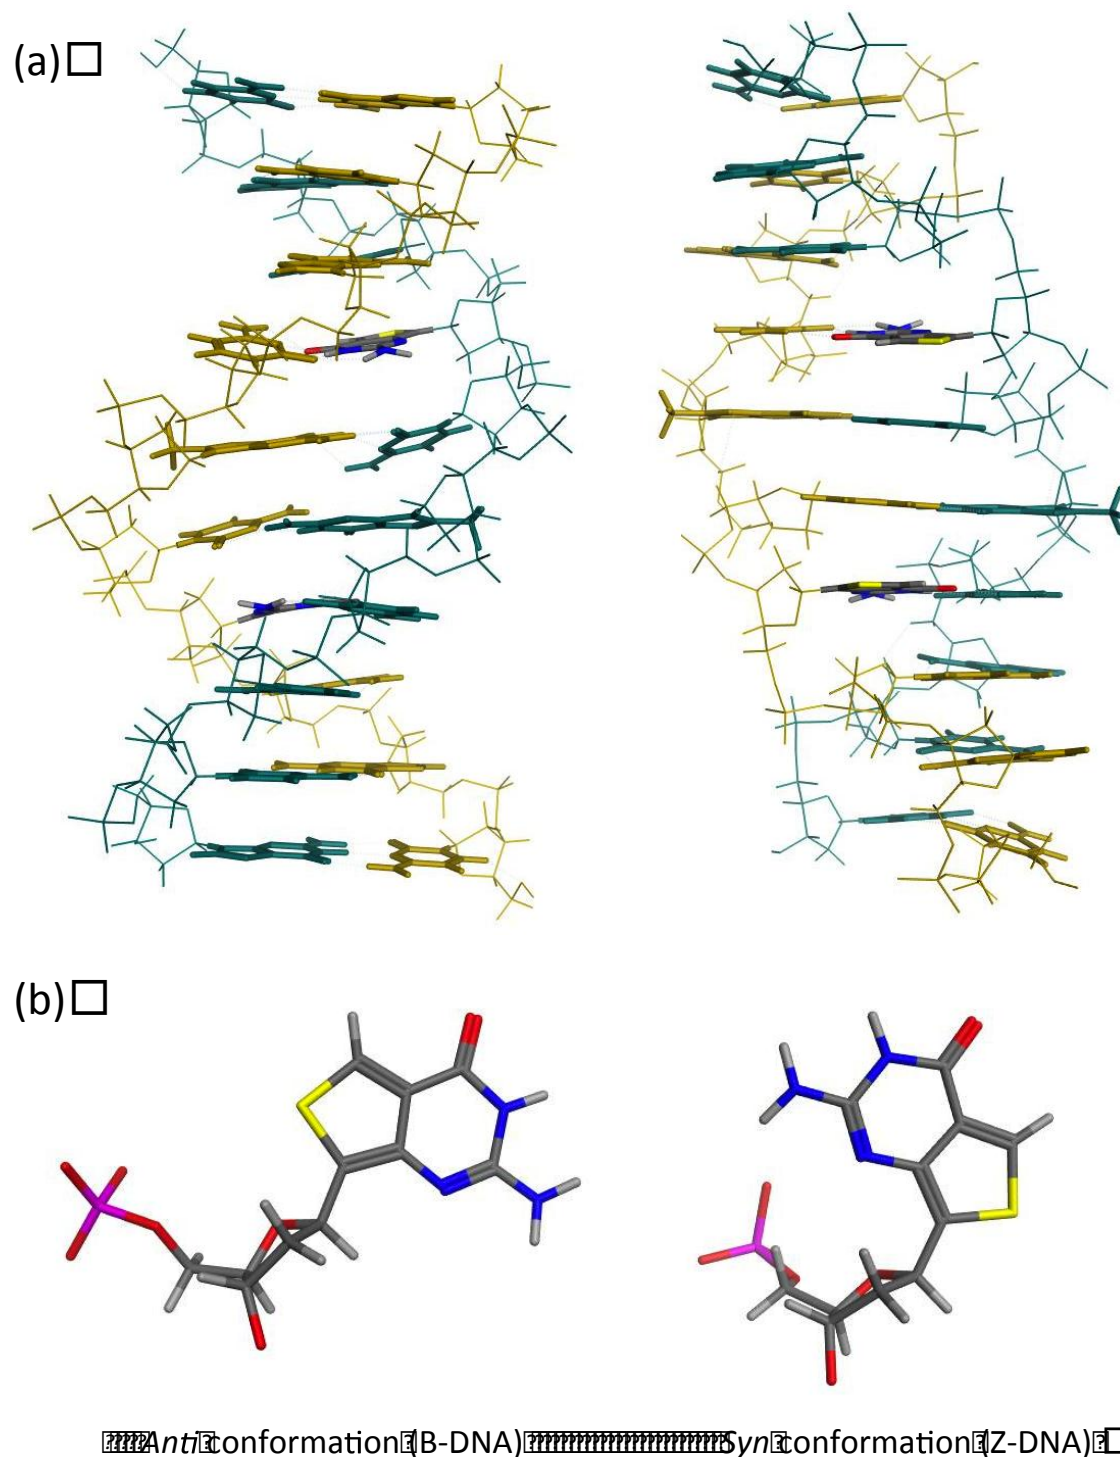

**Figure S11.** (a) Molecular models of B-form (left) and Z-form DNA of ODN9 (right). The sulfur atoms of <sup>th</sup>dG are drawn in yellow. (b) *Syn* and *anti* conformation of thieno[3,4-*d*]-pyrimidine relative to the sugar in nucleotides. The Energy minimizations were performed using the MOE (Molecular Operating Environment). DNA structures were made using AMBER forcefield and the dielectric constant  $\epsilon=4r_{ij}$ .

### **Preparation of Z $\alpha$ $\beta$ protein.**

Z $\alpha$  $\beta$  domain of ADAR1 was expressed using a plasmid (pET21a-Z $\alpha$  $\beta$ ) containing a subcloned Z $\alpha$  $\beta$  domain. pET21a-Z $\alpha$  $\beta$  was transformed to an *E. coli* BL21 (DE3) competent cell. Small cultured cell was grown in a 500 ml of LB medium with ampicillin (100  $\mu$ g/ml) at 37 °C for 2 h, and then the target protein was induced with 0.5 mM IPTG at 30 °C for 6 h. The cell was harvested by centrifuge at 9,000 rpm for 5 min, then the collected pellet was resuspended in a 50 mM Tris-HCl buffer (pH 8.0) containing 300 mM NaCl. After sonication and centrifuge at 15,000 rpm for 30 min at 4 °C, the supernatant was incubated with Ni-NTA beads for 2 h. The beads were washed, and then the bound protein was eluted with increasing concentrations of imidazole (50, 100, 200, and 400 mM; 1.0-ml fractions). The eluted protein sample (usually 200 mM fraction) was dialyzed against 20 mM Tris-HCl (pH 7.5) and 20 mM NaCl. The concentration was determined by BCA method.

### **Visual detection of B-Z transition by Z $\alpha$ $\beta$ interaction**

0-20 equivalent of Z $\alpha$  $\beta$  was added to 1.3  $\mu$ M of ODN9 and 100 mM of NaCl in 20 mM Tris-HCl buffer (pH 7.5). After incubation at 37 °C for 30 min, the photo was taken under UV irradiation. For the visualization of the dynamic change of the color, relatively high concentration of DNA solution was used. CD spectroscopy and fluorescence measurement were also observed (Figure S12). To investigate the possibility that Z $\alpha$  $\beta$  increased the fluorescence without B-Z transition, 0 or 4 equivalent of Z $\alpha$  $\beta$  was added to 1.3  $\mu$ M of ODN1 (B-form) and 100 mM of NaCl in 20 mM Tris-HCl buffer (pH 7.5). After incubation at 37 °C for 30 min, fluorescence measurement was conducted (Figure S13). Consequently, we found that Z $\alpha$  $\beta$  did not induce the big difference on the fluorescence compared with B-Z transition.

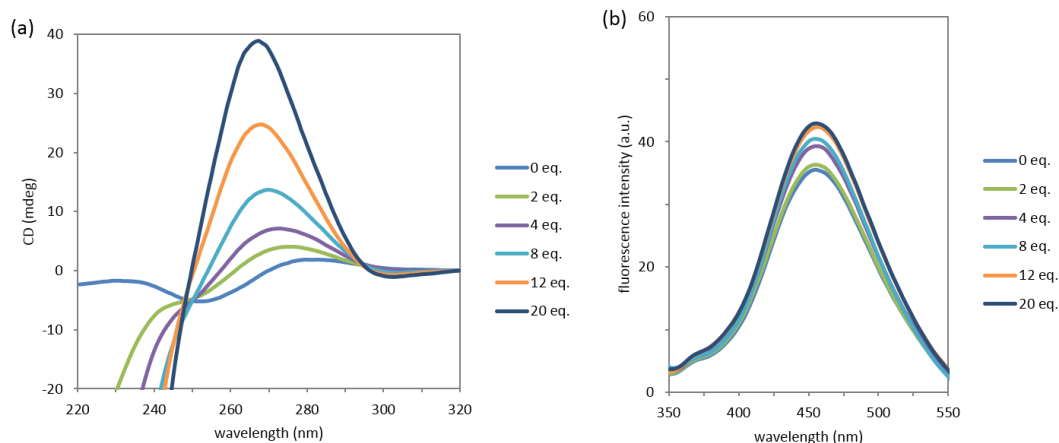

**Figure S12.** CD spectra and fluorescence properties of ODN9 with 0-20 equivalent of Z $\alpha\beta$ .

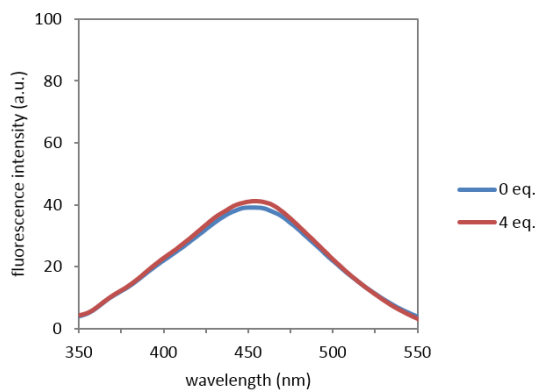

**Figure S13.** Fluorescence properties of ODN1 with 0 or 4 equivalent of Z $\alpha\beta$ .

### References :

- [1] D. Shin, R. W. Sinkeldam, Y. Tor, *J. Am. Chem. Soc.*, 2011, **133**, 14912.
- [2] C. G $\acute{e}$ nu-Dellac, G. Gosselin, J.-L. Imbach, *Carbohydr. Res.*, 1991, **216**, 249.
- [3] T. Brown, *Aldrichimica Acta*, 1995, **28**, 15
- [4] A. Lane, B. Peck, *Eur. J. Biochem.*, 1995, **230**, 1073
